# Supplementary material
Source: publisher site journal article supplement (https://www.dovepress.com/article/251168)
Supplement: Supplementary file 1 [file get_supplementary_file.php]

**Supplementary Table 1**

Identification of rheumatoid arthritis patients and subgroups

|  | **ICD-8 codes (NPR)** | **ICD-10 codes (NPR)** | **Treatment procedure code (NPR)** | **ATC codes (DNPR)** |
| --- | --- | --- | --- | --- |
| Identification of RA patients (conventional synthetic DMARDs) | 712.19, 712.39, and 712.59 | M05.3, M05.8, M05.9, and M06.9 |  | Methotrexate (L01BA01, L04AX03), Sulfasalazine (A07EC01), Azathioprine (L04AX01), Hydroxychloroquine (P01BA02), and Leflunomide (L04AA13) |
| Other RA |  | M06X |  |  |
| Seropositive RA |  | M05X |  |  |
| Biological DMARDs |  |  | Eternacept (BOHJ18A2), Infliximab (BOHJ18A1), Adalimumab (BOHJ18A3), Golimumab (BOHJ18A4), Certolizumab (BOHJ18A5), Tocilizumab (BOHJ18B2), Abatacept (BOHJ18C1), and Rituximab (BOHJ11) |  |
| Glucocorticoid injections |  |  | BLHN0 (injections in joints and tissue),  BLHN00 (injections in upper extremities), BLHO01 (injection in lower extremities), BLHN05 (injections in muscle tissue), and BEHO01 (injections in temporomandibular joint) |  |
